# Supplementary material for: Impact of JH Signaling on Reproductive Physiology of the Classical Insect Model, Rhodnius prolixus
Source: MDPI journal article supplement (doi:10.3390/ijms232213832), 2022-11-10
Supplement: s1 [file s1]

---

Supplementary

# Impact of JH Signaling on Reproductive Physiology of the Classical Insect Model, *Rhodnius prolixus*

Jimena Leyria \*, Ian Orchard and Angela B. Lange

Department of Biology, University of Toronto Mississauga, Mississauga, ON, L5L 1C6, Canada

\*Correspondence: jimenal.leyria@utoronto.ca; Tel.: +1-(905)-569-4752

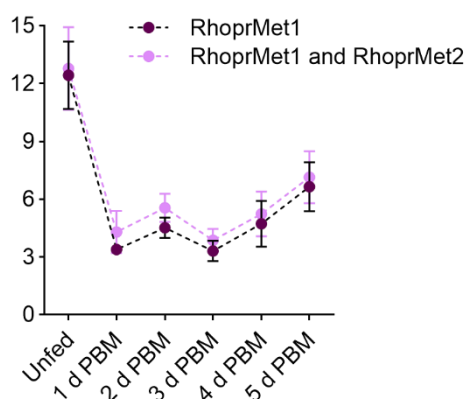

**Supplementary Figure S1. *RhoprMet1* and total *RhoprMet* (*RhoprMet1* + *RhoprMet2*) transcript expression.** Expression profiles of the Met isoforms in the fat body of adult females were examined by RTPCR at 10 d post ecdysis (unfed) and throughout 5 days post blood meal (d PBM). The transcript expression was quantified using RT-qPCR and analyzed by the  $2^{-\Delta Ct}$  method. The y axis represents the relative expression obtained via geometric averaging using *Rp49*, *18S rRNA* and *actin* as reference genes. The results are shown as the mean  $\pm$  SEM (n = 5, where each n represents a pool of tissues from 3 insects). No significant differences were found between *RhoprMet1* and total *RhoprMet* transcript expression (Two-way ANOVA and a Tukey's test as the post hoc test).

---

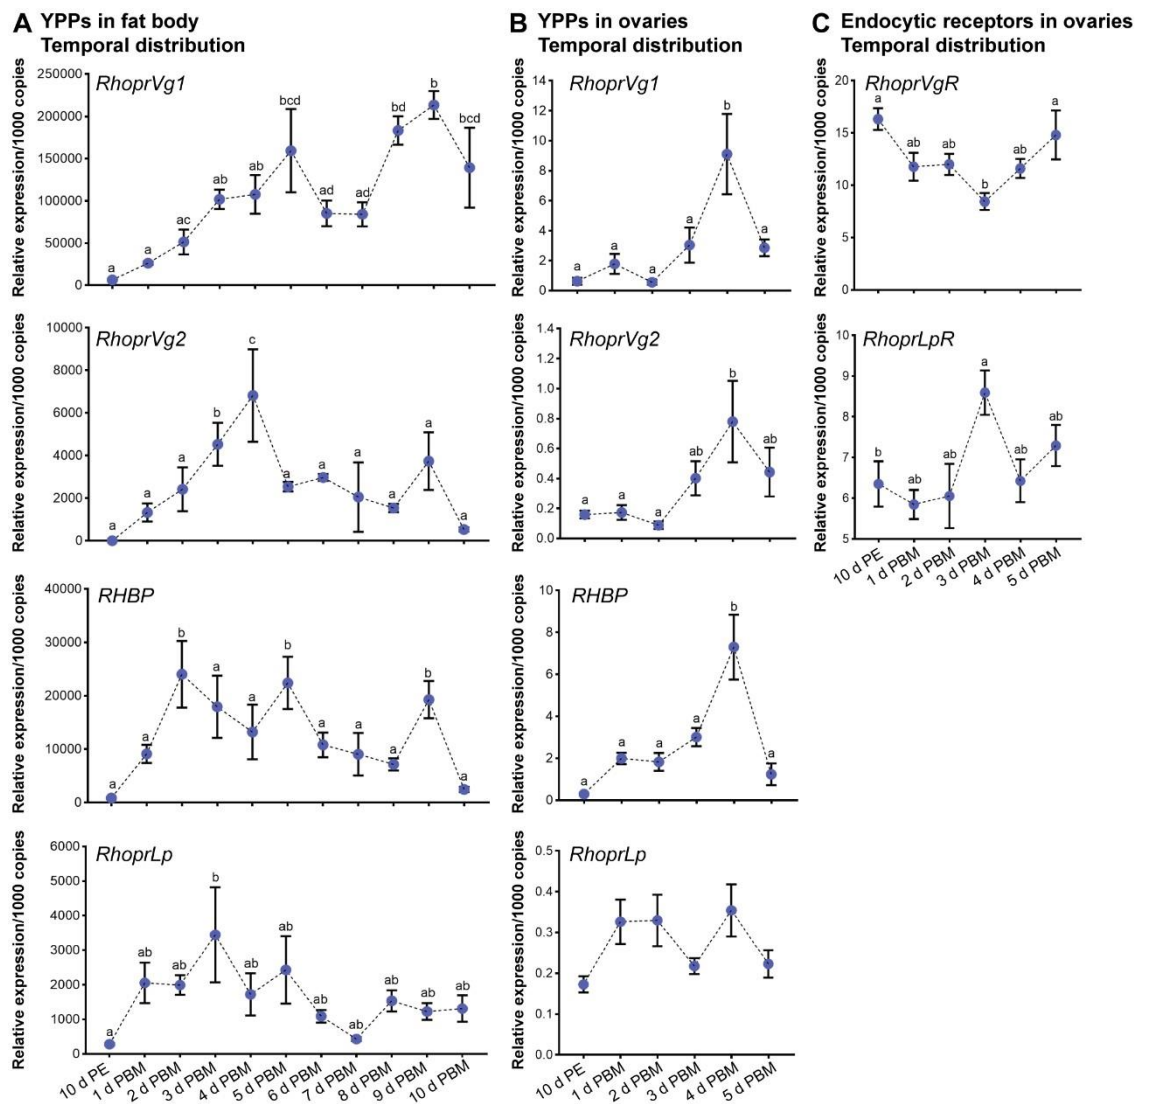

**Supplementary Figure S2. Temporal transcript expression of yolk protein precursors (YPPs) and endocytic receptors.** (A) *RhoprVg1*, *RhoprVg2*, *RHBP* and *RhoprLp* transcript levels in the fat body at 10 d post ecdysis (d PE) and throughout 10 days post blood meal (d PBM); (B) *RhoprVg1*, *RhoprVg2*, *RHBP* and *RhoprLp* transcript levels in the ovaries at 10 d PE and throughout 5 d PBM (prior to oviposition); (C) *RhoprLpR* and *RhoprVgR* transcript expression in the ovaries at 10 d PE and throughout 5 d PBM. The transcript levels were quantified using RT-qPCR and analyzed by the  $2^{-\Delta Ct}$  method. The y axes represent the relative expression obtained via geometric averaging using *Rp49*, *18S rRNA* and *actin* as reference genes. The results are shown as the mean  $\pm$  SEM (n = 4-5, where each n represents a pool of tissues from 3 insects). Different letters indicate significant differences at p < 0.05 (One-way ANOVA and Tukey's test as the post hoc test).

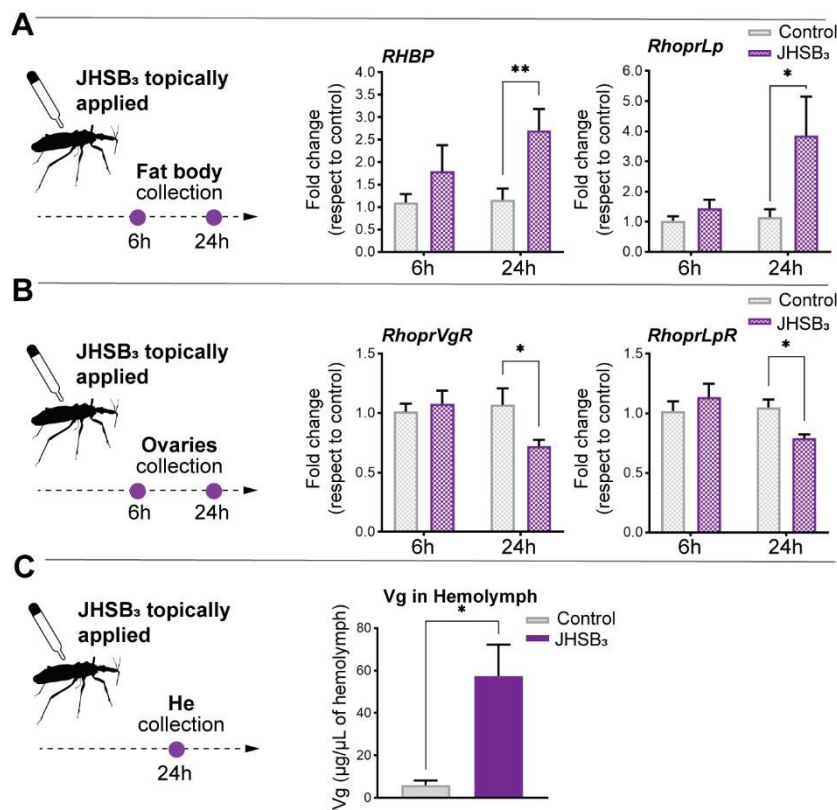

**Supplementary Figure S3. In vivo assays: effect of JHSB<sub>3</sub> treatment (50 pg in 10 μL of acetone) on mRNA expression of yolk protein precursors and endocytic receptors in the fat body and ovaries, and vitellogenin levels in the hemolymph.** JHSB<sub>3</sub> was topically applied in newly emerged adult females, and transcript levels of *RHBP* and *RhoprLp* in the fat body (**A**), and *RhoprVgR* and *RhoprLpR* in the ovaries (**B**) were measured at 6 and 24 h after topical application. Transcript expression was quantified using RT-qPCR and analyzed using the  $2^{-\Delta\Delta C_t}$  method. The y axes represent fold change in expression relative to control (10 μL of acetone, value ~ 1) obtained via geometric averaging using *Rp49* and *actin* as reference genes. The results are shown as the mean  $\pm$  SEM (n = 5, where each n represents an individual tissue from 1 insect). (C) Vitellogenin (Vg) levels in the hemolymph (He) were measured by ELISA at 24 h after the treatment. The results are shown as the mean  $\pm$  SEM (n = 5, where each n represents the hemolymph from 1 insect). \*p<0.05; \*\*p<0.01 (Student's t-test).

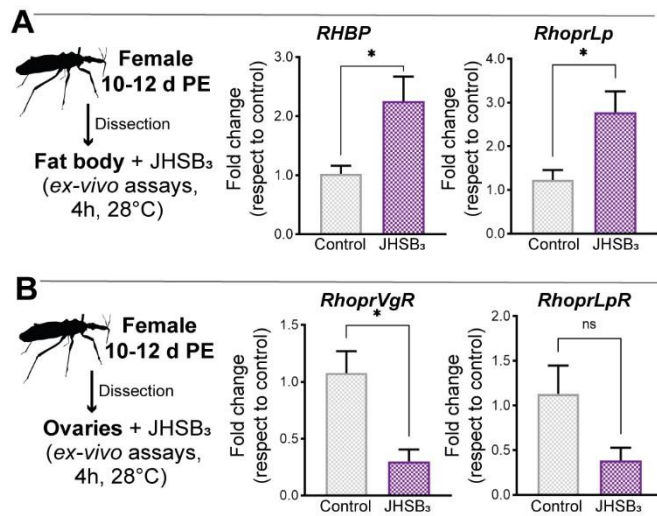

**Supplementary Figure S4. Ex vivo assays: effect of JHSB<sub>3</sub> treatment (35 nM) on mRNA expression of yolk protein precursors and endocytic receptors in the fat body and ovaries.** JHSB<sub>3</sub> was dissolved in acetone, and then added to the incubation medium containing an individual fat body or ovary, as indicated. Transcript levels of *RHBP* and *RhoprLp* in the fat body (**A**), and *RhoprVgR* and *RhoprLpR* in the ovaries (**B**), were quantified using RT-qPCR and analyzed by the  $2^{-\Delta\Delta C_t}$  method. The y axes represent fold change in expression relative to control (acetone, value ~ 1) obtained via geometric averaging using *Rp49* and *actin* as reference genes. The results are shown as the mean  $\pm$  SEM ( $n = 5$ , where each  $n$  represents an individual tissue from 1 insect). \* $p < 0.05$ ; ns, non-significant (Student's t-test).

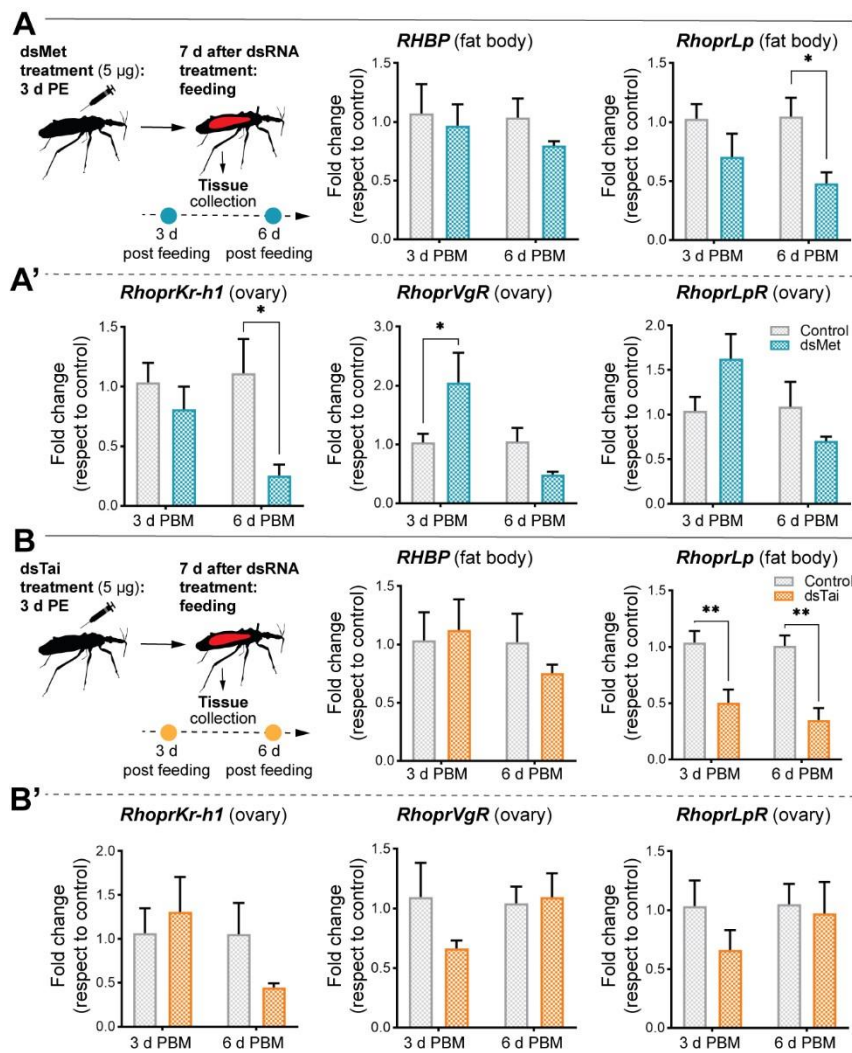

**Supplementary Figure S5. Effect of dsRNA treatment at two time points during vitellogenesis. (A)** *RHPBP* and *RhoprLp* mRNA expression in the fat body after dsMet injection. **(A')** *RhoprKr-h1*, *RhoprVgR* and *RhoprLpR* mRNA expression in the ovaries after dsMet injection. **(B)** *RHPBP* and *RhoprLp* mRNA expression in the fat body after dsTai injection. **(B')** *RhoprKr-h1*, *RhoprVgR* and *RhoprLpR* mRNA expression in the ovaries after dsTai injection. Transcript levels were quantified using RT-qPCR and analyzed by the  $2^{-\Delta\Delta C_t}$  method. The y axes represent the fold change in expression relative to control (dsARG, value ~ 1) obtained via geometric averaging using *Rp49* and *actin* as reference genes. The results are shown as the mean  $\pm$  SEM ( $n = 5-6$ , where each  $n$  represents an individual tissue from 1 insect). \* $p < 0.05$  (Student's t-test).

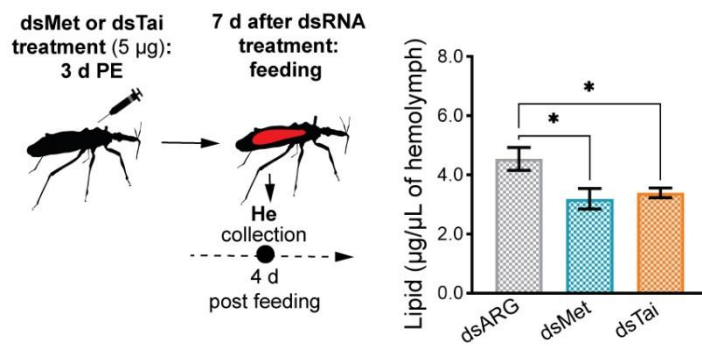

**Supplementary Figure S6. Effect of dsRNA treatment on hemolymph (He) lipid levels in adult females at 4 days post blood meal.** The y axis represents µg of lipid per µL of hemolymph. The results are shown as the mean ± SEM (n = 5-6, where each n represents hemolymph from 1 insect). \*p<0.05 (One-way ANOVA and Tukey's test as the post hoc test).

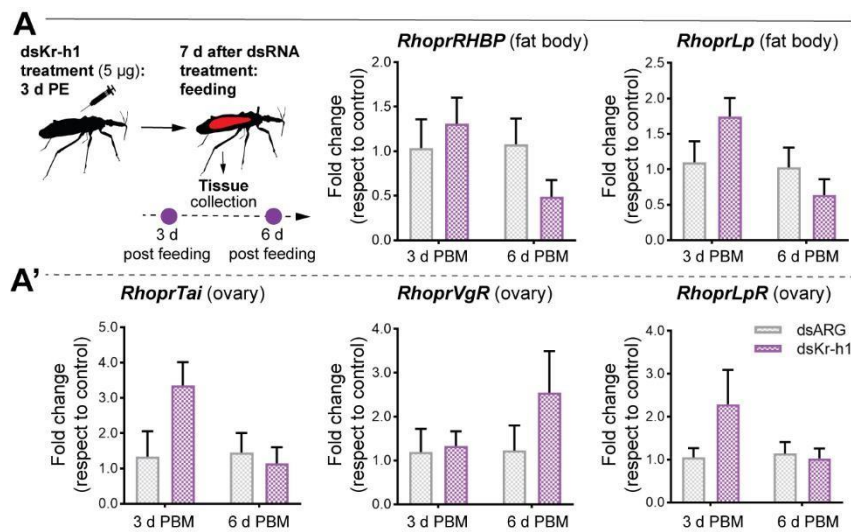

**Supplementary Figure S7. Effect of dsKr-h1 treatment at two time points during vitellogenesis.** (A) *RHBP* and *RhoprLp* mRNA expression in the fat body after dsKr-h1 injection. (A') *RhoprTai*, *RhoprVgR* and *RhoprLpR* expression in the ovaries after dsKr-h1 injection. Transcript levels were quantified using RT-qPCR and analyzed by the  $2^{-\Delta\Delta C_t}$  method. The y axes represent the fold change in expression relative to control (dsARG, value ~ 1) obtained via geometric averaging using *Rp49* and *actin* as reference genes. The results are shown as the mean  $\pm$  SEM (n = 5-6, where each n represents an individual tissue from 1 insect). \*p<0.05 (Student's t-test).

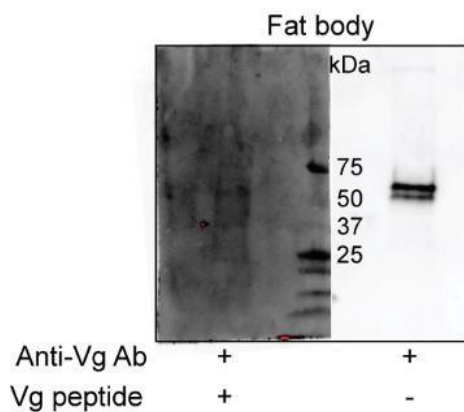

**Supplementary Figure S8. Pre-adsorption ("blocking") control.** The anti-vitellogenin antibody (Anti-Vg Ab, 1:2000 dilution in TBS-0.1% Tween 20 containing 5% BSA) was pre-incubated overnight at 4°C with a molar excess of the immunogen (Vg peptide: PLPQFVLQSRPELVPLPKLVAGGQVLDIVKTKNYSNCEQRMAYHFGLTGLTDWEPASNQ, final concentration: 1ng/µl). Pre-adsorption (left panel) substantially decreased the intensity of Vg staining in fat body protein; note an increase in the dark background due to overexposure for the low signal.

**Supplementary Table S1.** Primers used for qPCR and dsRNA synthesis.

| Gene code              | Primers to qPCR                    | Sequence (5'3')            |
|------------------------|------------------------------------|----------------------------|
| JN416985.1             | <sup>†</sup> Met isoform 1_forward | CTAAGTCTACAAAGGAAGTCAC     |
|                        | Met isoform 1_reverse              | CCTGACGAAGTGACAATC         |
| JN416985.1             | Total Met_forward                  | GATGGGAGGAATCCTGTTGA       |
|                        | Total Met_reverse                  | GGCAAGTCTGGATCGAAGTC       |
| RPRC001318; RPRC001317 | Tai_forward                        | CACAACGTCCATCCACTCCA       |
|                        | Tai_reverse                        | TTCTTTGCAGCGGTCTCACT       |
| RPRC014398             | Kr-h1_forward                      | ACAACCTGTAGTGGCTGTCG       |
|                        | Kr-h1_reverse                      | CGTACACTGTAGCGTGTCGT       |
| RPRC013511             | Vg 1_forward                       | TTGCTAGTCGCATGAACCTG       |
|                        | Vg 1_reverse                       | TTTAGTGGTGCATCGCTCTG       |
| RPRC002109             | Vg 2_forward                       | TCCATTGCCTAACCTCCTTG       |
|                        | Vg 2_reverse                       | GTAAGGACGATGCGGCTAAC       |
| RPRC002125             | Lp_forward                         | CTTTGCACATCGGAGACTGA       |
|                        | Lp_reverse                         | GTTCCCTGTATGCGCATTTT       |
| RPRC009875             | Actin_forward                      | AGAGAAAAGATGACGCAGA-TAATGT |
|                        | Actin_reverse                      | ATATCCCTAACAATTTAC-GTTTCG  |
| RPRC014419             | Rp49_forward                       | GTGAAACTCAGGAGAAATTGGC     |
|                        | Rp49_reverse                       | AGGACACACCATGCGCTATC       |
| AJ421962.1             | 18S_forward                        | TCGGCCAACAAAAGTACACA       |
|                        | 18S_reverse                        | TGTCGGTGTAACCTGGCATGT      |
| RPRC011390             | LpR_forward                        | CTCGATGAACCGAGAGCAAT       |
|                        | LpR_reverse                        | ATTCAGTTTGGCGTCTACCC       |
| RPRC000551             | VgR_forward                        | ATTTGGACGGATTGGGGTA        |
|                        | VgR_reverse                        | TGGAGGAAAGAATGGTCCTG       |
| RPRC004408             | RHBP_forward                       | TCCTTCACACTCTCCGCAAC       |
|                        | RHBP_reverse                       | GTACGCTTGGTACGCCACTT       |
| RPRC007496             | Thiol_forward                      | CAAAGTTAATGTACAC-GGTGGTG   |
|                        | Thiol_reverse                      | CTCCAGACTTCAACGCTGTTA      |



| RPRC007884                                                     | §HMGS_forward    | GCAACTGTTTGAA-<br>GAAAGTGGTA                         |
|----------------------------------------------------------------|------------------|------------------------------------------------------|
|                                                                | HMGS_reverse     | AAGCACTGGTACCTCCAAAG                                 |
| Supercontig<br>RproC3:KQ03422 6 minus<br>strand 878233-875494  | §HMGR_forward    | GGCATAGAAAGAAGATGAC-<br>CAAAC                        |
|                                                                | HMGR_reverse     | GCACGAGTATCAAGACAACAA-<br>TATG                       |
| RPRC014277                                                     | §MEVK_forward    | GAAAGATCAAGAGGAACGAG-<br>GAG                         |
|                                                                | MEVK_reverse     | CGCTTATGTGAGACAC-<br>CTAATGAT                        |
| RPRC010547                                                     | §FOLD_forward    | AAACCGAGCGATGTTGT                                    |
|                                                                | FOLD_reverse     | GTAGGTTGGATAACTAG-<br>TTCTGAT                        |
| RPRC002910                                                     | §FALDH_forward   | AGTACCTTACAGTCTAGTATTT-<br>GCC                       |
|                                                                | FALDH_reverse    | GATCTGTCTTCAGCACCGTT                                 |
| RPRC011659                                                     | §JHAMT_forward   | GGACCAGGCGATGTTACTTT                                 |
|                                                                | JHAMT_reverse    | CCAAATCATCAGAAA-<br>TATCGCTTCC                       |
| RPRC000513                                                     | §EpoX_forward    | CGGAGAATTGAT-<br>TCATGATGATTGG                       |
|                                                                | EpoX_reverse     | GTAACGGCGGTGACAGTAAA                                 |
| Gene code      Primers to dsRNA synthesis      Sequence (5'3') |                  |                                                      |
| RPRC014398                                                     | dsKr-h1a_forward | TAATACGACTCACTATAGGGA-<br>GAACA<br>ACAAGTGGTAGCGGTGT |
|                                                                | dsKr-h1a_reverse | TAATACGACTCACTATAGGGA-<br>GATTCT<br>CACCTGTATGCGTCCG |
| RPRC014398                                                     | dsKr-h1b_forward | TAATACGACTCACTATAGGGA-<br>GACTTG<br>TGCGTCTTCAACCAGC |

|            |                  |                                                                        |
|------------|------------------|------------------------------------------------------------------------|
|            | dsKr-h1b_reverse | <b>TAATACGACTCACTATAGGGA-</b><br><b>GACTA</b><br>CTCGGCGGGGTTAACAG     |
| RPRC001318 | dsTai a_forward  | <b>TAATACGACTCACTATAGGGA-</b><br><b>GACGC</b><br>TTTCCTTTCAGCCCAC      |
|            | dsTai a_reverse  | <b>TAATACGACTCAC-</b><br><b>TATAGGGAGACAG</b><br>CTTCTTCGGAACCTCGGT    |
| RPRC001318 | dsTai b_forward  | <b>TAATACGACTCACTATAGGGA-</b><br><b>GAGCT</b><br>CCGCCAAGAAATCGAAC     |
|            | dsTai b_reverse  | <b>TAATACGACTCACTATAGGGA-</b><br><b>GATAA</b><br>GCTGCCGAAATGCCAGA     |
| JN416985.1 | dsMet a_forward  | <b>TAATACGACTCACTATAGGGA-</b><br><b>GATAA</b><br>TTGGTGCCATTGCGTGC     |
|            | dsMet a_reverse  | <b>TAATACGACTCACTATAGGGA-</b><br><b>GAAAT</b><br>CATCACCCACCGCACAT     |
| JN416985.1 | dsMet b_forward  | <b>TAATACGACTCACTATAGGGA-</b><br><b>GAAGC</b><br>GCAGATGAAAGCTCAGT     |
|            | dsMet b_reverse  | <b>TAATACGACTCACTATAGGGA-</b><br><b>GACCC</b><br>ATAACCGCGGGTCAATA     |
| ARG        | dsARG_forward    | <b>TAATACGACTCACTATAGGGA-</b><br><b>GAATG</b><br>AGTATTCAACATTTCCGTGTC |
|            | dsARG_reverse    | <b>TAATACGACTCACTATAGGGA-</b><br><b>GAAAT</b><br>AGTTTGCGCAACGTTG      |

\***TAATACGACTCACTATAGGGAGA** = T7 RNA polymerase promotor

<sup>†</sup>Primers reported by Villalobos-Sambucaro et al. [21]

§Primers reported by Villalobos-Sambucaro et al. [6]

Abbreviations: Met, Methoprene-tolerant; Tai, Taiman; Kr-h1, Krüppel-homolog 1; Vg, vitellogenin; Lp, lipophorin; Actin,  $\beta$ -actin; Rp49, 60S ribosomal protein L32; 18S, 18S ribosomal RNA; LpR, lipophorin receptor; VgR, vitellogenin receptor; RHBP, Rhodnius heme binding protein; thiol, Acetyl-CoA-thiolase; HMGR, HMG-CoA reductase; HMGS, HMG-CoA synthase; MEVK, Mevalonate Kinase; FOLD, Farnesol dehydrogenase; FALDH, Farnesol dehydrogenase; JHAMT, Juvenile hormone acid methyltransferase; Epox, Methyl farneseoate epoxidase; ARG, ampicillin resistance gene; ds, double stranded

1. Villalobos-Sambucaro, M.J.; Nouzova, M.; Ramirez, C.E.; Alzugaray, M.E.; Fernandez-Lima, F.; Ronderos, J.R.; Noriega, F.G. The juvenile hormone described in *Rhodnius prolixus* by Wigglesworth is juvenile hormone III skipped bisepoxide. *Sci. Rep.* **2020**, *10*, 3091.
2. Villalobos-Sambucaro, M.J.; Riccillo, F.L.; Calderón-Fernández, G.M.; Sterkel, M.; Diambra, L.A.; Ronderos, J.R. Genomic and functional characterization of a methoprene-tolerant gene in the kissing-bug *Rhodnius prolixus*. *Gen. Comp. Endocrinol.* **2015**, *216*, 1–8.
